# Supplementary material for: Fluorinated silsesquioxane-based photoresist as an ideal high-performance material for ultraviolet nanoimprinting
Source: Royal Society of Chemistry journal article supplement (doi:10.1039/c4ra06022a), 2014-01-01
Supplement: c4ra06022a1.pdf [file c4ra06022a1.pdf]

## Supporting information

### Fluorinated Silsesquioxane-based Photoresist as ideal Material with High-Performance for Ultraviolet Nanoimprinting

Guanghai Lin, Fang Zhang, Qi Zhang, Jie Wei\* Jinbao Guo\*

College of Materials Science and Engineering, Beijing University of Chemical Technology, Beijing 100029, P. R. China. Correspondence to: Jinbao Guo (guojb@mail.buct.edu.cn); Jie Wei (weij@mail.buct.edu.cn).

Table S1. Surface free energy parameters of test liquids

| Liquid          | $\gamma_L$ | $\gamma^{LW}$ | $\gamma^+$ | $\gamma^-$ |
|-----------------|------------|---------------|------------|------------|
| Diodomethane    | 50.8       | 50.8          | 0          | 0          |
| Ethylene glycol | 48.0       | 29.0          | 3.0        | 30.1       |
| Water           | 72.8       | 21.8          | 25.5       | 25.5       |

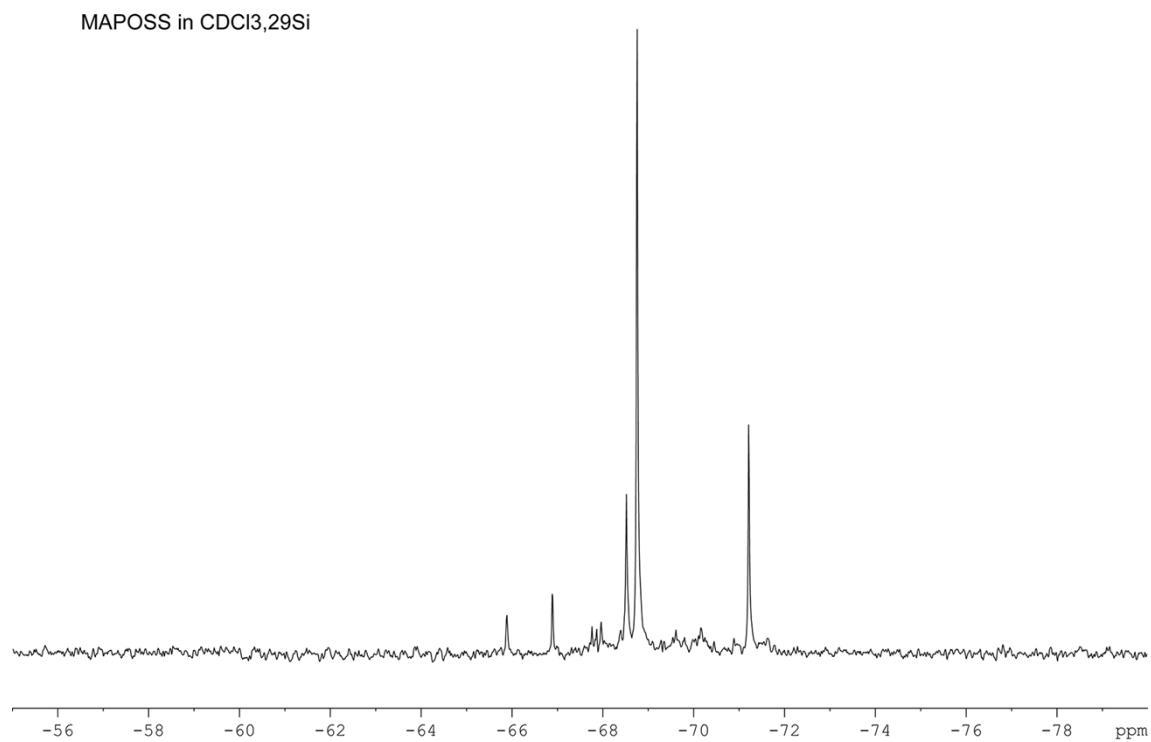

Fig. S1 <sup>29</sup>Si NMR spectrum of MAPOSS in CDCl<sub>3</sub>

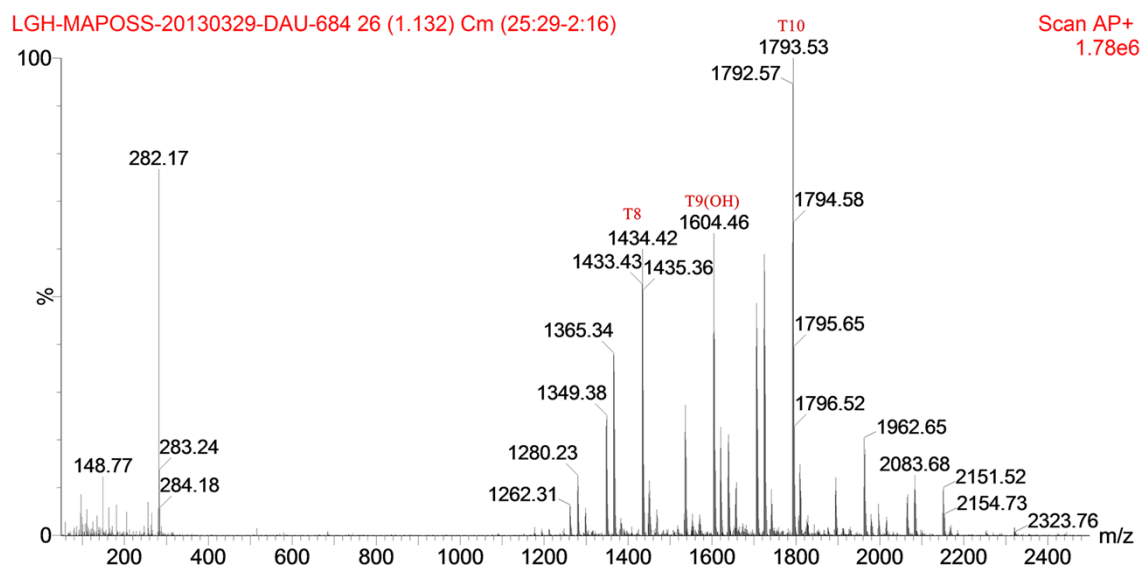

Fig. S2 Mass distribution of the MAPOSS from LC-MS

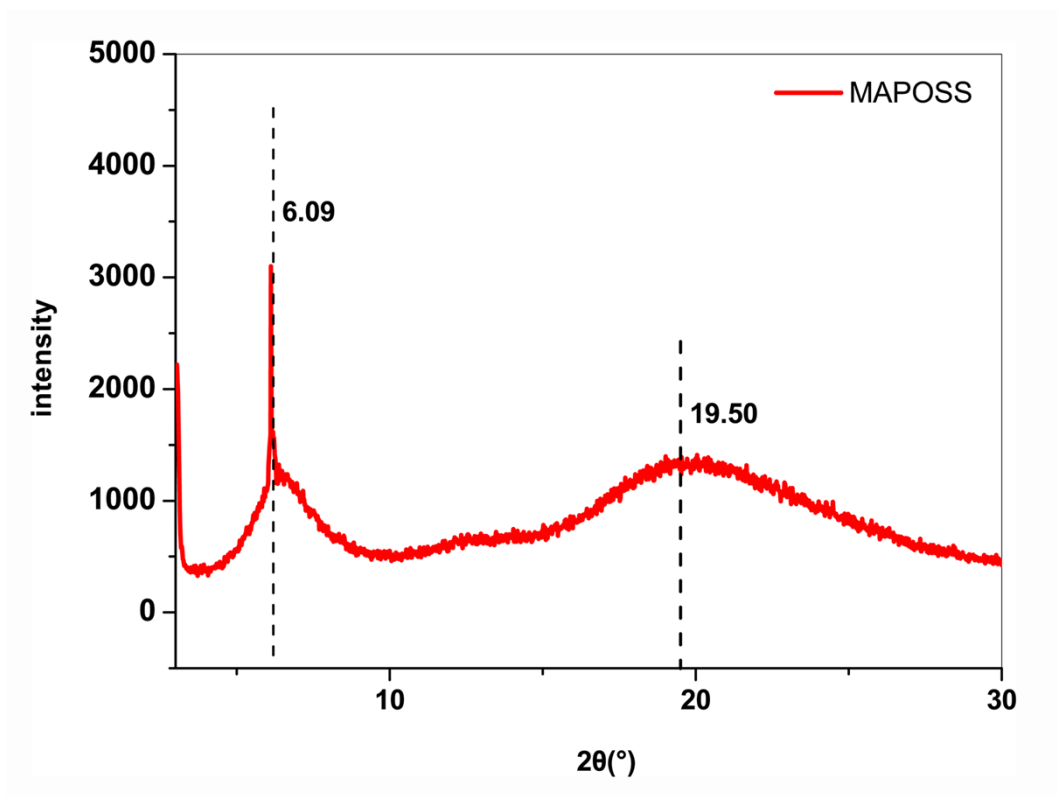

Fig. S3 XRD of the MAPOSS
